# Supplementary material for: An N-of-1 Trial of Itacitinib for a Patient with Aplastic Anemia Associated with a Gain-of-Function Variant in STAT1
Source: Research Square preprint supplement (doi:10.21203/rs.3.rs-139401/v1), 2021-01-08
Supplement: Supplementary file 1 [file 88b9ae76d04c9b3137073cb2.xlsx]

## Sheet: Sheet1
Szabo_CD8Tcell_Cytotoxic PMID:31624246	Szabo_CD8Tcell_CytokineEffector PMID:31624246	Miller_CD8Tcell_Exhausted PMID30778252	Mostafavi_IFNalpha PMID:26824662	Satoh_IFNgamma PMID:23645984
CCL5	CCL3	FASLG	OASL	IDO1
GZMK	CCL3L3	CD7	BST2	CXCL10
GNLY	IFNG	CD160	CCNYL1	IRF1
TRGC2	CCL4	RGS1	CCRL2	GBP5
FGFBP2	GZMB	CXCR6	CD274	ITK
C1orf21	XCL1	GZMA	CD86	ICAM1
KLRF1	XCL2	CCL3	CLIC4	APOL6
FCGR3A	CCR1	CCL4	CMPK2	TMEM140
PTGDR	IL10	NR4A2	CXCL10	PARP9
KLRC2	HOPX	LAG3	CYSLTR2	GBP2
EOMES	FASLG	MBNL1	DAXX	CTSS
S1PR5	GZMH	PLAC8	DDX60	CXCL9
CLIC3	BATF3	ABI3	DHX58	TRIM21
AOAH	TIMD4	SH2D2A	EIF2AK2	GBP1
CADM1	FEZ1	PTGER4	EOMES	CCL2
TRGC1	HAVCR2	CD8A	IFIT1	DTX3L
DTHD1	ZBTB32	ISG15	GBP2	PSMB9
LILRB1	SLC27A2	CD3G	GBP3	CCDC68
SAMD3	LAG3	PTPN22	GBP5	APOL1
ZNF683	PRF1	LAX1	GBP6	PDCD1LG2
KLRD1	IL18RAP	PDCD1	IRF7
NCR1	GZMA	GZMK	ISG15
FAM49A	PTMS	GZMB	GZMB
KLRG1	PHLDA1	ITPKB	MLKL
CTSW	ZBED2	GLRX	HERC6
CD244	NCS1	ID2	MX2
CMC1	IQCG	RGS3	IFI44
APOBEC3H	JAKMIP1	ARL6IP1	IFIH1
CST7	KLRC1	VMP1	PPA1
CX3CR1	CRTAM	EFHD2	IFIT2
FCRL6	CCR5	STAT1	IFIT3
TMCC3	EGR2	GIMAP7	IFITM3
PLA2G16	TNFRSF9	DUSP2	SETDB2
TYROBP	TNF	SHISA5	UBE2L6
TPRG1	SLC4A10	TAPBPL	OGFRL1
C12orf75	ADAM19		ISG20
PLCG2	MSC		PARP14
PLEK	METRNL		MX1
RCAN2	SLAMF7		PHF11
DKK3	NKG7		NAMPT
ADRB2	CXCR6		PLAC8
FCRL3	CD70		TNFSF10
NKG7	ATP8B4		RGS1
PPP2R2B	SDC4		OAS2
SYNGR1	ELOVL6		OAS3
KLRC4	ADAP1		XAF1
HLA-DPB1	IL26		PARP9
DAPK2	RDH10		SLFN5
F2R	LTA		PARP12
B3GAT1	MICAL2		TLR7
CD8B	TNIP3		TRIM21
TTC16	CCL20		TDRD7
GALNT3	ULBP2		PIK3AP1
SCD5	CEBPD		RTP4
PDGFD	RCAN2		TOR3A
ABCB1	ZEB2		RSAD2
MXRA7	CD226		TLR3
CTBP2	SEMA4A		STAT2
CD8A	SLAMF1		USP18
ZEB2	SEMA7A		TRAFD1
SYTL2	FAM3C		ZBP1
CHN2	SPAG1
FGR	PRDM1
TGFBR3	KLRD1
SETBP1	ST8SIA4
COLGALT2	IER3
KIR2DL4	PLEK
FKBP1B
